# Supplementary material
Source: publisher figshare collection journal article supplement (https://tandf.figshare.com/ndownloader/files/20369661)
Supplement: Supplementary file 1 [file 20369661]

##### Table A1: Legislative Amendments and Government Orders (GOs) Delegating Powers and Functions to the Industrial Area Local Authority (IALA)

| **Act** | **Powers and Functions delegated through various GOs** |
| --- | --- |
| Andhra Pradesh Panchayati Raj Act, Section 147 | Provisions relating to Taxation and Finance |
|  | Provisions relating to Public Safety, Convenience and Health  (including encroachments and obstructions) |
|  | General and Miscellaneous (Gram Panchayats) Provisions.  (including naming of streets; licensing of “professions”; inspection, appeal and others) |
|  | Miscellaneous Provisions  (recovery of arrears, inspections etc) |
| Andhra Pradesh Municipalities Act, Section 389-B | Provisions relating to Property Tax, Tax on advertisements, duty on transfer of property |
|  | Provisions relating to water supply |
|  | Provisions relating to lighting, public and private drainage |
|  | Provisions relating to scavenging |
|  | Provisions relating to public streets |
|  | Provisions relating to private streets and encroachments on streets |
|  | Prohibition against making holes and causing obstruction in streets; License for work on buildings likely to cause obstruction (as public safety) |
|  | Provisions relating to powers of entry and inspection, enforcing license proceedings, payment of compensation etc |
| Hyderabad Municipal Corporation Act, Section 679-F | Municipal Taxation; Property taxes; Special provisions concerning the water and conservancy taxes |
|  | Municipal Drains; Disposal of sewage from individual sources; Water-closets, privies, urinals etc; Inspection |
|  | Public streets; provisions regarding private streets; Projections and obstructions; naming of streets; street lighting; dangerous structures, unlawful and other works; inspection |
|  | Scavenging and cleaning, Inspection and sanitary  regulation of premises |
|  | Regulation of Factories, trades etc |

Source: Adapted from Kennedy and Sood (2019)
